# Supplementary material for: Construction and Optimization Strategy of an Ecological Network in Mountainous Areas: A Case Study in Southwestern Hubei Province, China
Source: MDPI journal article supplement (doi:10.3390/ijerph19159582), 2022-08-04
Supplement: s1 [file s1]

**Supplementary materials** for "Construction and optimization strategy of ecological network in mountainous areas: A case study in southwestern Hubei Province, China"

**Table S1.** Land use classification system in the study area.

| Type            |                    | Description                                                                                                                                                                                                                                                                                                                                |
|-----------------|--------------------|--------------------------------------------------------------------------------------------------------------------------------------------------------------------------------------------------------------------------------------------------------------------------------------------------------------------------------------------|
| First class     | Second class       |                                                                                                                                                                                                                                                                                                                                            |
| Cultivated land | Paddy field        | Cultivated land with guaranteed water source and irrigation facilities, which can be irrigated normally in normal years and used for growing rice, lotus root and other aquatic crops, including cultivated land where rice and dryland crops are rotated.                                                                                 |
|                 | Dry land           | Cultivated land without irrigation water source and facilities, which grows crops by natural water; dry crop arable land with water source and watering facilities, which can be irrigated normally in a normal year; cultivated land mainly for growing vegetables; recreational land and rotational rest land with normal crop rotation. |
| Forestland      | Woodland           | Natural forests and plantations with a denseness of >30%.                                                                                                                                                                                                                                                                                  |
|                 | Bush forest        | Dwarf and scrub forestland with >40% depression and less than 2 m in height.                                                                                                                                                                                                                                                               |
|                 | Spare woodland     | Forestland with 10-30% tree densities.                                                                                                                                                                                                                                                                                                     |
|                 | Other woodland     | Unestablished afforestation land, trails, nurseries and various types of gardens.                                                                                                                                                                                                                                                          |
| Grassland       | High grass cover   | Natural grassland, improved grassland and mowed land with >50% cover.                                                                                                                                                                                                                                                                      |
|                 | Medium grass cover | Natural and improved grasslands with >20-50% cover.                                                                                                                                                                                                                                                                                        |
|                 | Low grass cover    | Natural grassland with 5-20% cover.                                                                                                                                                                                                                                                                                                        |
| Water bodies    | Canal              | Naturally formed or artificially excavated rivers and land below the perennial water level of the main stem.                                                                                                                                                                                                                               |
|                 | Lake               | Land below the perennial water level in naturally occurring waterlogged areas.                                                                                                                                                                                                                                                             |
|                 | Reservoir pond     | Land below the perennial water level in the artificially constructed water storage area.                                                                                                                                                                                                                                                   |

|                   |                         |                                                                                                                                                         |
|-------------------|-------------------------|---------------------------------------------------------------------------------------------------------------------------------------------------------|
|                   | Bottom land             | Land between the level of the river and lake waters during the flat water period and the level of the flood period.                                     |
| Construction land | Urban land              | Land in large, medium and small cities and construction areas above the county town.                                                                    |
|                   | Rural residential land  | Rural settlements that are independent of towns and cities.                                                                                             |
|                   | Other construction land | Land for factories, mines, large industrial areas, oil fields, salt fields, quarries, etc., as well as traffic roads, airports and special land.        |
| Unused land       | Marshland               | Land is flat and low-lying, poorly drained, chronically wet, seasonally waterlogged or perennially waterlogged, with wet plants growing on the surface. |
|                   | Bare land               | Land with surface soil cover and less than 5% vegetation cover.                                                                                         |
|                   | Bare rocky land         | Land with a rocky or gravelly surface that covers >5% of the area.                                                                                      |

Source: <https://www.resdc.cn/data.aspx?DATAID=335>

**Table S2.** Threat factors and their stress intensity.

| Threat factor           | Maximum impact distance (km) | Weight | Types of spatial decay |
|-------------------------|------------------------------|--------|------------------------|
| Paddy field             | 5                            | 0.5    | exponential            |
| Dry land                | 5                            | 0.5    | exponential            |
| Urban land              | 10                           | 1      | exponential            |
| Rural residential land  | 5                            | 0.6    | exponential            |
| Other construction land | 3                            | 0.8    | exponential            |
| Main railways           | 4                            | 0.4    | linear                 |
| Main roads              | 3                            | 0.4    | linear                 |

**Table S3.** Habitat suitability and its relative sensitivity to different threat sources.

| Land use types          | Habitat suitability | Threat factor |          |            |                        |                         |               |            |
|-------------------------|---------------------|---------------|----------|------------|------------------------|-------------------------|---------------|------------|
|                         |                     | Paddy field   | Dry land | Urban land | Rural residential land | Other construction land | Main railways | Main roads |
| Paddy field             | 0.50                | 0             | 1        | 0.50       | 0.70                   | 0.60                    | 0.10          | 0.20       |
| Dry land                | 0.40                | 1             | 0        | 0.50       | 0.70                   | 0.60                    | 0.10          | 0.20       |
| Woodland                | 1                   | 0.50          | 0.60     | 0.80       | 0.80                   | 0.80                    | 0.60          | 0.80       |
| Bush forest             | 0.80                | 0.30          | 0.40     | 0.60       | 0.70                   | 0.70                    | 0.60          | 0.70       |
| Spare woodland          | 0.75                | 0.50          | 0.60     | 0.90       | 0.80                   | 0.80                    | 0.50          | 0.60       |
| Other woodland          | 0.65                | 0.50          | 0.60     | 0.90       | 0.80                   | 0.80                    | 0.40          | 0.50       |
| High grass cover        | 0.80                | 0.40          | 0.45     | 0.60       | 0.60                   | 0.60                    | 0.10          | 0.15       |
| Medium grass cover      | 0.75                | 0.45          | 0.50     | 0.65       | 0.70                   | 0.65                    | 0.15          | 0.20       |
| Low grass cover         | 0.65                | 0.50          | 0.55     | 0.65       | 0.70                   | 0.65                    | 0.20          | 0.25       |
| Canal                   | 1                   | 0.50          | 0.60     | 0.85       | 0.70                   | 0.75                    | 0.40          | 0.45       |
| Lake                    | 0.90                | 0.55          | 0.65     | 0.90       | 0.75                   | 0.75                    | 0.45          | 0.50       |
| Reservoir pond          | 0.90                | 0.60          | 0.70     | 0.90       | 0.80                   | 0.80                    | 0.50          | 0.55       |
| Bottom land             | 0.60                | 0.65          | 0.75     | 0.80       | 0.75                   | 0.75                    | 0.55          | 0.60       |
| Urban land              | 0                   | 0             | 0        | 0          | 0                      | 0                       | 0             | 0          |
| Rural residential land  | 0                   | 0             | 0        | 0          | 0                      | 0                       | 0             | 0          |
| Other construction land | 0                   | 0             | 0        | 0          | 0                      | 0                       | 0             | 0          |
| Marshland               | 0.60                | 0.50          | 0.60     | 0.80       | 0.60                   | 0.50                    | 0.60          | 0.70       |
| Bare land               | 0                   | 0             | 0        | 0          | 0                      | 0                       | 0             | 0          |
| Bare rocky land         | 0                   | 0             | 0        | 0          | 0                      | 0                       | 0             | 0          |

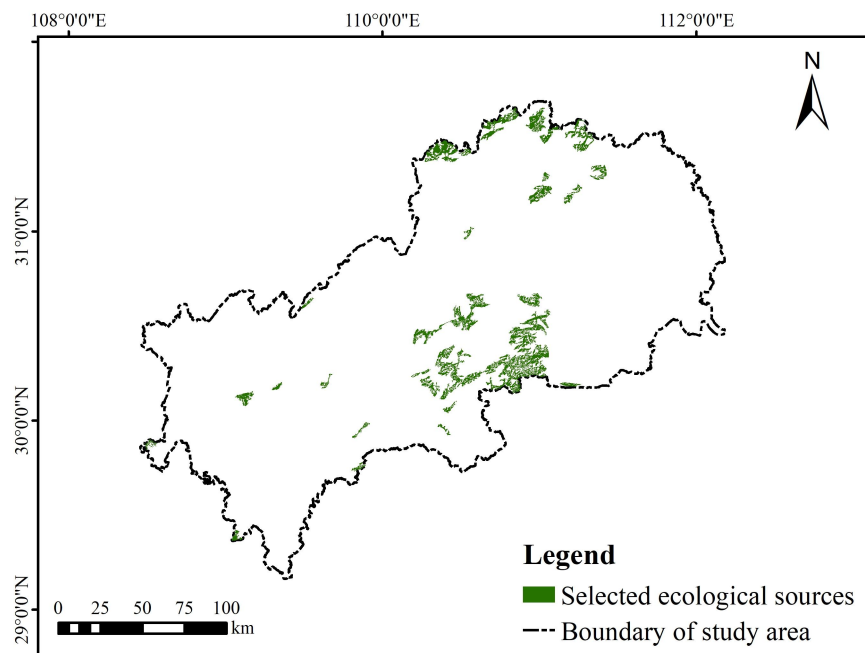

**Figure S1.** Alternative ecological source patches based on ecosystem service assessment, hotspots analysis and area screening.

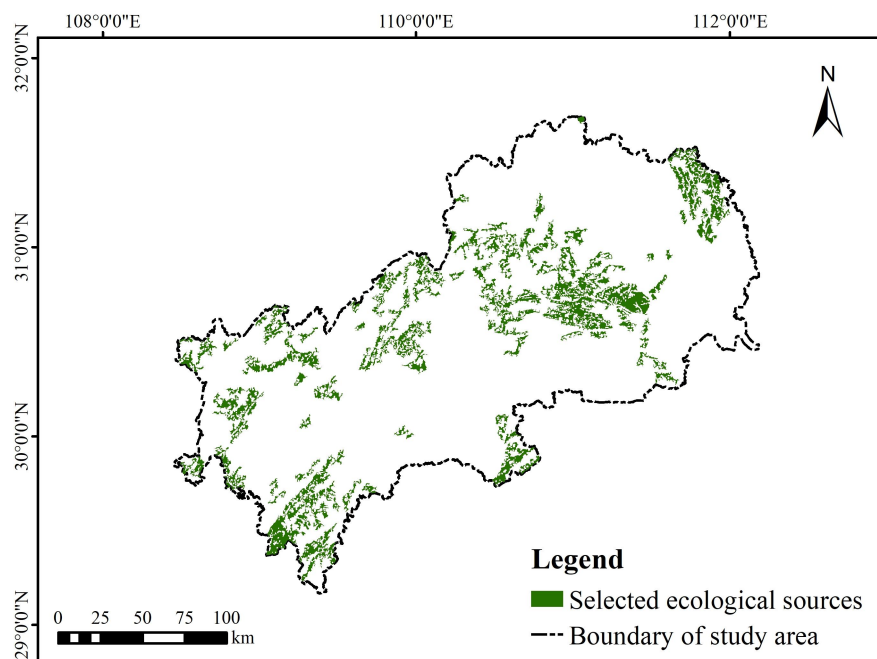

**Figure S2.** Alternative ecological source patches based on MSPA analysis and area screening.

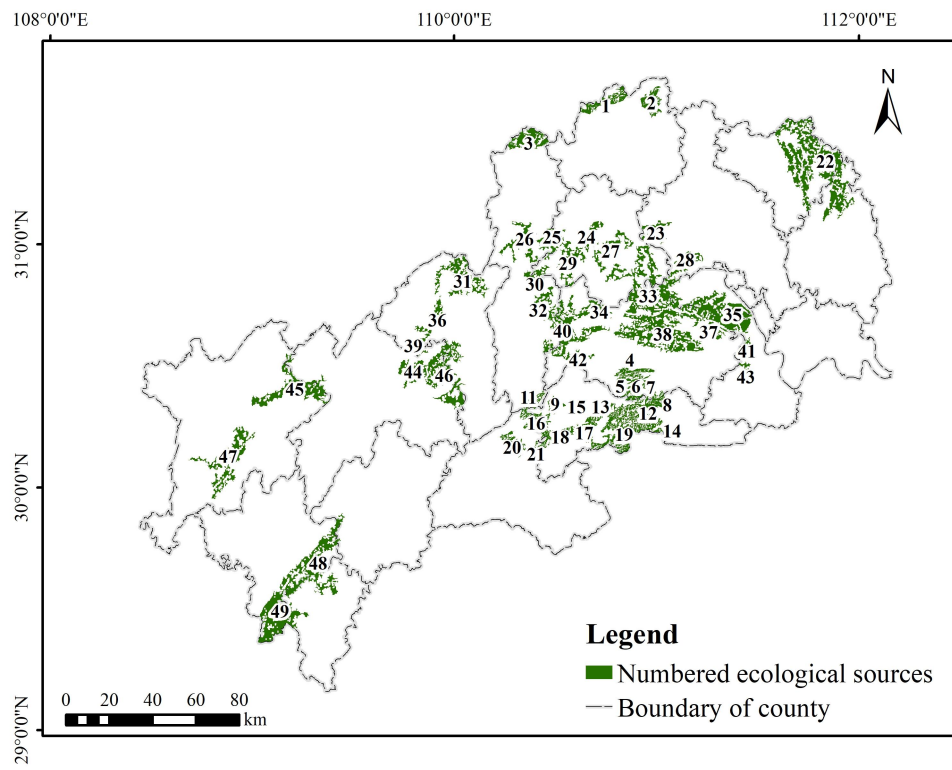

**Figure S3.** Numbered ecological sources in the study area.

**Table S4.** Optimal diffusion distances.

| Ecological source number | Optimal diffusion distance (m) | Ecological source number | Optimal diffusion distance (m) |
|--------------------------|--------------------------------|--------------------------|--------------------------------|
| 1                        | 600                            | 36                       | 100                            |
| 2                        | 500                            | 37                       | 100                            |
| 9                        | 400                            | 39                       | 200                            |
| 10                       | 500                            | 41                       | 100                            |
| 14                       | 900                            | 42                       | 100                            |
| 23                       | 400                            | 43                       | 100                            |
| 28                       | 100                            | 45                       | 100                            |
| 30                       | 300                            | 47                       | 400                            |
| 31                       | 200                            |                          |                                |
| 32                       | 200                            |                          |                                |

Note: The number of ecological sources corresponds to Figure S3.

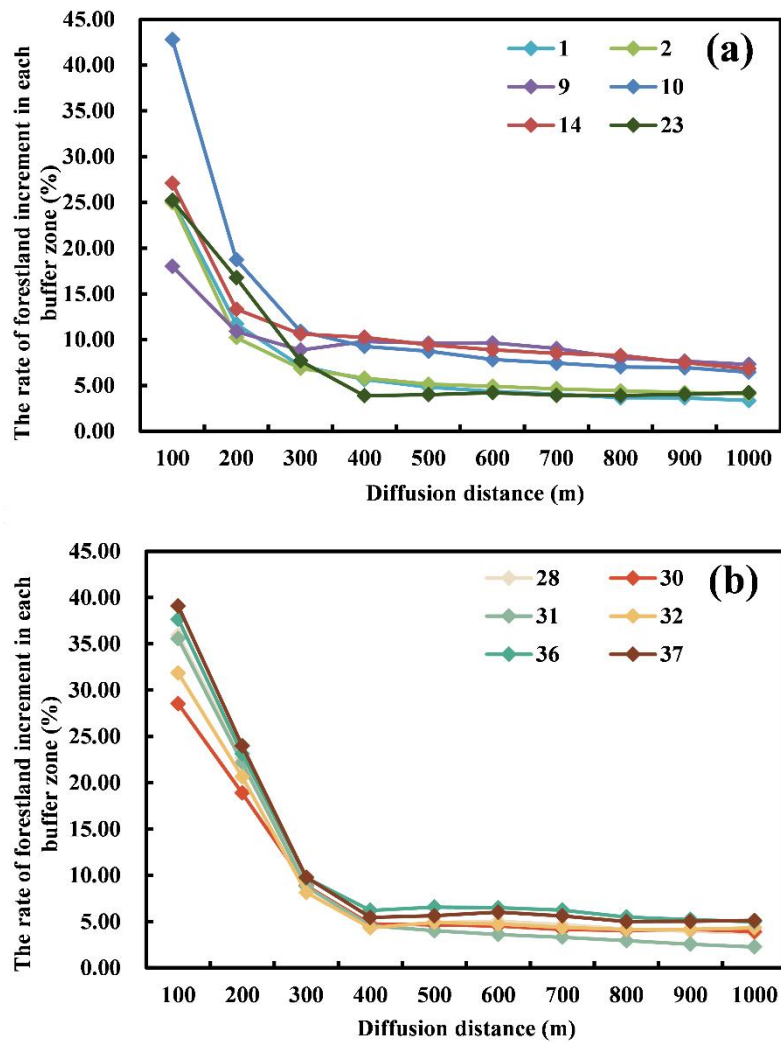

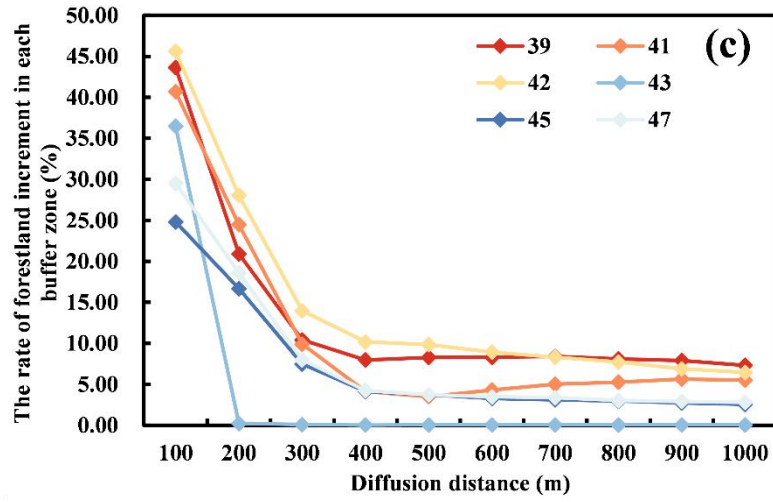

**Figure S4.** Change curve of the rate of forestland increment with the increase of ecological sources buffer distance in the study area: (a) number 1,2,9,10, 14 and 23; (b) number 28,30,31,32,36 and 37; (c) number 39,41,42,43,45 and 47.

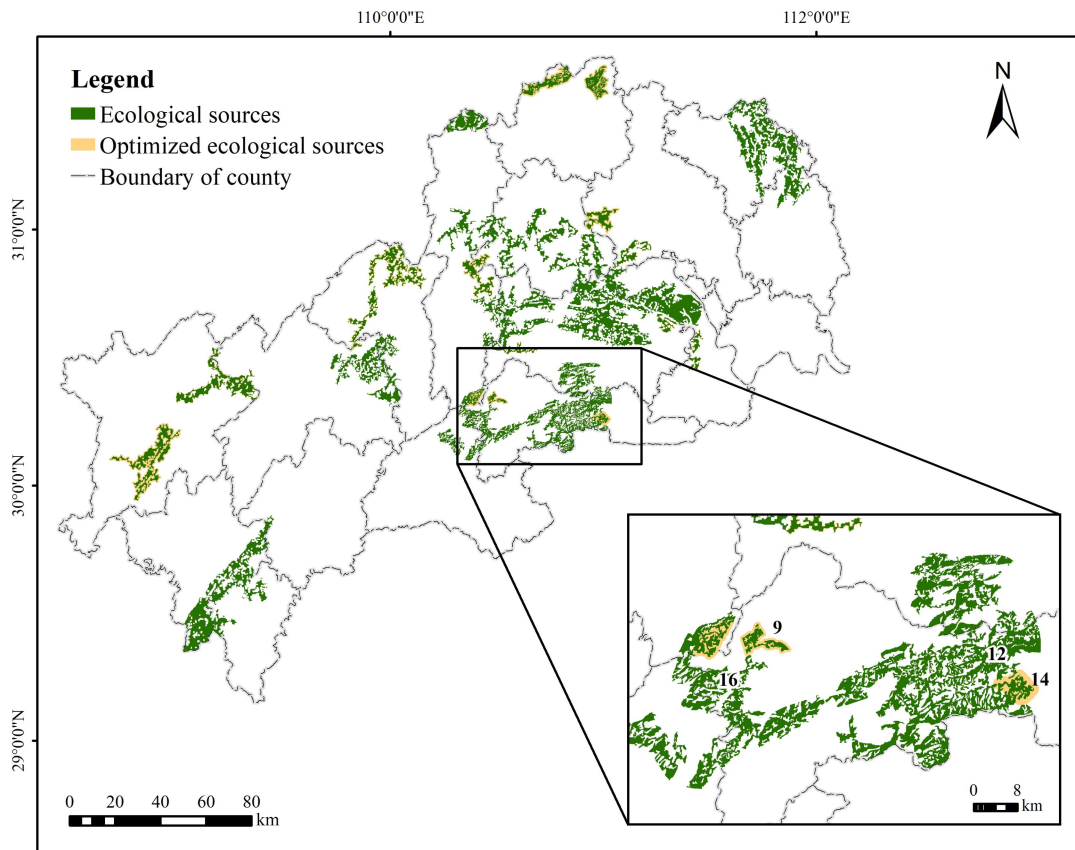

**Figure S5.** Spatial distribution of optimized ecological sources.

**Table S5.** Classification based on the standard deviation of minimum cumulative resistance.

| Classification | Value range         | Grid number | Proportion (%) | Ecological function zone     |
|----------------|---------------------|-------------|----------------|------------------------------|
| C1             | 0—38,183            | 10,664,658  | 21.28          | Ecological conservation zone |
| C2             | 38,184—131,896      | 6,643,914   | 13.25          | Ecological buffer zone       |
| C3             | 131,897—225,610     | 5,114,100   | 10.20          | Ecological transition zone   |
| C4             | 225,611—319,323     | 4,521,963   | 9.02           |                              |
| C5             | 319,324—413,036     | 4,194,532   | 8.37           |                              |
| C6             | 413,037—506,749     | 3,896,765   | 7.77           |                              |
| C7             | 506,750—600,462     | 3,521,618   | 7.03           |                              |
| C8             | 600,463—694,175     | 2,942,096   | 5.87           | Ecological available zone    |
| C9             | 694,176—787,888     | 2,371,752   | 4.73           |                              |
| C10            | 787,889—881,601     | 1,868,419   | 3.73           |                              |
| C11            | 881,602—975,314     | 1,222,657   | 2.44           |                              |
| C12            | 975,315—1,069,027   | 847,598     | 1.69           |                              |
| C13            | 1,069,028—1,162,740 | 610,597     | 1.22           |                              |
| C14            | 1,162,741—1,256,453 | 386,916     | 0.77           |                              |
| C15            | 1,256,454—1,350,166 | 232,913     | 0.46           |                              |
| C16            | 1,350,167—1,443,880 | 161,181     | 0.32           |                              |
| C17            | 1,443,881—2,859,299 | 922,332     | 1.84           |                              |
| Total          |                     | 50,124,011  | 100.00         |                              |
